# Supplementary material
Source: PubMed Central journal article supplement (PMC3637915)
Supplement: NIHMS401256-supplement-01.pdf [file NIHMS401256-supplement-01.pdf]

For the online version of the article, not to be included in the print version.

**Appendix A:** Groupings of principal diagnoses for readmission hospitalization.

| <b>Infection</b>           |                                                                                                                                                                                                                                                                                            |
|----------------------------|--------------------------------------------------------------------------------------------------------------------------------------------------------------------------------------------------------------------------------------------------------------------------------------------|
| Post-op Wound Infection    | 56961 Infected colostomy/enterostomy<br>99762 Infection amputated stump<br>99851 Infected postoperative seroma<br>99859 Other postoperative infection                                                                                                                                      |
| C. diff                    | 00845 Clostridium difficile                                                                                                                                                                                                                                                                |
| Abscess                    | 5130 Abscess of lung<br>5696 Intestinal abscess<br>5720 Abscess of liver                                                                                                                                                                                                                   |
| Cellulitis                 | 68110 Cellulitis, toe NOS<br>6826 Leg cellulitis<br>6827 Cellulitis of foot                                                                                                                                                                                                                |
| Septicemia                 | 0380 Streptococcal septicemia<br>03819 Other staph septicemia<br>0383 Anaerobic septicemia<br>03842 E. coli septicemia<br>03843 Pseudomonas septicemia<br>03849 Gram-negative septicemia NEC<br>0389 Septicemia<br>7907 Bacteremia                                                         |
| Urinary infection          | 59010 Acute pyelonephritis, NOS<br>5990 Urinary tract infection                                                                                                                                                                                                                            |
| Other infection            | 9993 Infectious complication of medical care NEC                                                                                                                                                                                                                                           |
| <b>Gastrointestinal</b>    |                                                                                                                                                                                                                                                                                            |
| Ileus/obstruction/stenosis | 5370 Acquired pyloric stenosis<br>55221 Obstruction incisional hernia<br>5528 Hernia, site NEC w/ obstruction<br>5601 Paralytic ileus<br>56081 Intestinal adhesions with obstruction<br>56089 Intestinal obstruction NEC<br>5609 Intestinal obstruction NOS<br>5692 Rectal & anal stenosis |
| Nausea/Vomiting/Diarrhea   | 5643 Vomiting post-GI surgery<br>78701 Nausea with vomiting<br>78791 Diarrhea                                                                                                                                                                                                              |
| Stomach complications      | 5363 Gastroparesis<br>5589 Noninfectious gastroenteritis NEC                                                                                                                                                                                                                               |
| GI Perforation             | 53150 Chronic stomach ulcer with perforation<br>56983 Perforation of intestine                                                                                                                                                                                                             |
| Diverticuli                | 56210 Diverticulosis of colon without hemorrhage                                                                                                                                                                                                                                           |

1  
2  
3  
4  
5  
6  
7  
8  
9  
10  
11  
12  
13  
14  
15  
16  
17  
18  
19  
20  
21  
22  
23  
24  
25  
26  
27  
28  
29  
30  
31  
32  
33  
34  
35  
36  
37  
38  
39  
40  
41  
42  
43  
44  
45  
46  
47  
48  
49  
50  
51  
52  
53  
54  
55  
56  
57  
58  
59  
60  
61  
62  
63  
64  
65

|                                      |                                                                                                                                                                                                                                                                                                                                                                                                                                                                                         |
|--------------------------------------|-----------------------------------------------------------------------------------------------------------------------------------------------------------------------------------------------------------------------------------------------------------------------------------------------------------------------------------------------------------------------------------------------------------------------------------------------------------------------------------------|
|                                      | 56211 Diverticulitis of colon without hemorrhage                                                                                                                                                                                                                                                                                                                                                                                                                                        |
| Esophagitis                          | 53010 Esophagitis, unspecified<br>53011 Reflux esophagitis<br>53019 Other esophagitis                                                                                                                                                                                                                                                                                                                                                                                                   |
| Fistula                              | 56981 Intestinal fistula<br>5961 Intestinovesical fistula<br>6191 Digestive-genital tract fistula, female<br>9986 Persistant postoperative fistula                                                                                                                                                                                                                                                                                                                                      |
| Gallbladder/Pancreas Disease         | 57400 Cholelithiasis with acute cholecystitis<br>57410 Cholelithiasis with cholecystitis NEC<br>57450 Choledocholithiasis NOS<br>5750 Acute cholecystitis<br>57511 Chronic cholecystitis<br>5770 Pancreatitis                                                                                                                                                                                                                                                                           |
| Liver                                | 570 Acute necrosis of liver<br>5715 Cirrhosis of liver NOS<br>5738 Liver disorders NEC                                                                                                                                                                                                                                                                                                                                                                                                  |
| Ulcer Disease                        | 53130 Acute stomach ulcer NOS<br>53290 Duodenal ulcer NOS<br>53390 Peptic ulcer NOS<br>56982 Ulceration of intestine                                                                                                                                                                                                                                                                                                                                                                    |
| Other gastrointestinal complications | 4552 Internal hemorrhoid with complication NEC<br>53100 Acute appendicitis NOS<br>53540 Other specified gastritis<br>5570 Acute vascular insufficiency intestine<br>56039 Impaction intestine NEC<br>5641 Irritable colon<br>5644 Other postoperative functional disorders<br>56949 Rectal & anal disease NEC<br>9974 Surgical complication – gastrointestinal                                                                                                                          |
| <b>Bleeding Complications</b>        |                                                                                                                                                                                                                                                                                                                                                                                                                                                                                         |
| Post-surgery                         | 56881 Hemoperitoneum<br>99811 Hemorrhage complicating procedure<br>99812 Hematoma                                                                                                                                                                                                                                                                                                                                                                                                       |
| Gastrointestinal                     | 53082 Esophageal hemorrhage<br>53100 Acute stomach ulcer with hemorrhage<br>53140 Chronic stomach ulcer with hemorrhage<br>53240 Chronic duodenal ulcer with hemorrhage<br>53440 Chronic marginal ulcer with hemorrhage<br>53541 Other specified gastritis with hemorrhage<br>53783 Angiodysplasia of stomach and duodenum with hemorrhage<br>56212 Diverticulosis of colon with hemorrhage<br>5693 Rectal & anal hemorrhage<br>5781 Blood in stool<br>5789 Gastrointestinal hemorrhage |

1  
2  
3  
4  
5  
6  
7  
8  
9  
10  
11  
12  
13  
14  
15  
16  
17  
18  
19  
20  
21  
22  
23  
24  
25  
26  
27  
28  
29  
30  
31  
32  
33  
34  
35  
36  
37  
38  
39  
40  
41  
42  
43  
44  
45  
46  
47  
48  
49  
50  
51  
52  
53  
54  
55  
56  
57  
58  
59  
60  
61  
62  
63  
64  
65

|                            |                                                                                                                                                                                                                                                                                                                                                                                                                                                          |
|----------------------------|----------------------------------------------------------------------------------------------------------------------------------------------------------------------------------------------------------------------------------------------------------------------------------------------------------------------------------------------------------------------------------------------------------------------------------------------------------|
| Other bleeding             | 2851 Acute posthemorrhage anemia<br>2869 Coagulation defect NEC/NOS<br>2866 Defibrination syndrome                                                                                                                                                                                                                                                                                                                                                       |
| <b>Neurologic</b>          |                                                                                                                                                                                                                                                                                                                                                                                                                                                          |
| Brain abnormalities        | 3313 Communicating hydrocephalus<br>3330 Degeneration basal ganglia NEC<br>3488 Brain conditions NEC<br>431 Intracerebral hemorrhage<br>4321 Subdural hemorrhage<br>43410 Cerebral embolism without infarct<br>43411 Cerebral embolism with infarct<br>43491 Cerebral artery occlusion NOS with infarction<br>4359 Transient cerebral ischemia NOS<br>436 Cerebrovascular accident<br>78039 Other convulsions<br>85302 Brain hemorrhage NEC – brief coma |
| Peripheral                 | 3553 Lateral popliteal nerve lesion                                                                                                                                                                                                                                                                                                                                                                                                                      |
| Other neurologic           | 99709 Other nervous system complication<br>34982 Toxic encephalopathy<br>38630 Labyrinthitis NOS<br>38635 Viral labyrinthitis<br>7802 Syncope and collapse                                                                                                                                                                                                                                                                                               |
| <b>Psychiatric</b>         |                                                                                                                                                                                                                                                                                                                                                                                                                                                          |
| Psychiatric                | 29281 Drug-induced delirium<br>29620 Depress psychosis - unspecified<br>2989 Psychosis NOS<br>30000 Anxiety state, NOS<br>3320 Paralysis agitans<br>7804 Dizziness and giddiness                                                                                                                                                                                                                                                                         |
| <b>Urinary</b>             |                                                                                                                                                                                                                                                                                                                                                                                                                                                          |
| Nephrolithiasis            | 5921 Calculus of ureter                                                                                                                                                                                                                                                                                                                                                                                                                                  |
| Obstruction/hydronephrosis | 591 Hydronephrosis<br>5934 Ureteric obstruction NEC<br>5996 Urinary obstruction NOS                                                                                                                                                                                                                                                                                                                                                                      |
| Cystitis                   | 5950 Acute cystitis<br>59582 Irradiation cystitis<br>5959 Cystitis NOS                                                                                                                                                                                                                                                                                                                                                                                   |
| Hematuria                  | 5967 Bladder wall hemorrhage<br>5997 Hematuria                                                                                                                                                                                                                                                                                                                                                                                                           |
| Other urinary              | 5845 Lower nephron nephrosis<br>6021 Prostatic congestion or hemorrhage<br>78820 Retention urine NOS<br>9975 Surgical complication – urinary tract                                                                                                                                                                                                                                                                                                       |
| <b>Pulmonary</b>           |                                                                                                                                                                                                                                                                                                                                                                                                                                                          |

1  
2  
3  
4  
5  
6  
7  
8  
9  
10  
11  
12  
13  
14  
15  
16  
17  
18  
19  
20  
21  
22  
23  
24  
25  
26  
27  
28  
29  
30  
31  
32  
33  
34  
35  
36  
37  
38  
39  
40  
41  
42  
43  
44  
45  
46  
47  
48  
49  
50  
51  
52  
53  
54  
55  
56  
57  
58  
59  
60  
61  
62  
63  
64  
65

|                                                   |                                                                                                                                                                                                                                                                                                                                                                                                                                                                                                                                                                                                                                                                                    |
|---------------------------------------------------|------------------------------------------------------------------------------------------------------------------------------------------------------------------------------------------------------------------------------------------------------------------------------------------------------------------------------------------------------------------------------------------------------------------------------------------------------------------------------------------------------------------------------------------------------------------------------------------------------------------------------------------------------------------------------------|
| Pneumonia                                         | 4820 Klebsiella pneumonia pneumonia<br>4821 Pseudomonal pneumonia<br>48239 Pneumonia other streptococcus<br>486 Pneumonia, organism NOS<br>5070 Food/vomit pneumonitis                                                                                                                                                                                                                                                                                                                                                                                                                                                                                                             |
| Pneumothorax                                      | 5120 Spontaneous tension pneumothorax<br>5121 Pneumothorax, iatrogenic<br>5128 Pneumothorax, spontaneous                                                                                                                                                                                                                                                                                                                                                                                                                                                                                                                                                                           |
| Pulmonary embolism                                | 41511 Iatrogenic pulmonary embolism, infarct                                                                                                                                                                                                                                                                                                                                                                                                                                                                                                                                                                                                                                       |
| Pleural effusion/empyema                          | 5100 Empyema with fistula<br>5109 Empyema without fistula<br>5118 Pleural effusion NEC, not TB<br>5119 Pleural effusion NOS                                                                                                                                                                                                                                                                                                                                                                                                                                                                                                                                                        |
| Other pulmonary                                   | 49120 Obstructive chronic bronchitis without acute exacerbation<br>49121 Obstruction chronic bronchitis with acute exacerbation<br>500 Coal workers' pneumoconiosis<br>5100 Pleurisy without effusion or TB<br>514 Pulmonary congestion/hypostasis<br>515 Postinflammatory pulmonary fibrosis<br>5163 Idiopathic fibrosing alveolitis<br>5180 Pulmonary collapse<br>5181 Interstitial emphysema<br>5185 Post trauma pulmonary insufficiency<br>51881 Respiratory failure<br>51882 Other pulmonary insufficiency<br>51889 Other lung disease NEC<br>78609 Respiratory abnormality NEC<br>9973 Surgical complication, respiratory system<br>99881 Emphysema resulting from procedure |
| <b>Cardiac</b>                                    |                                                                                                                                                                                                                                                                                                                                                                                                                                                                                                                                                                                                                                                                                    |
| Arrhythmias                                       | 42613 AV block – 2 <sup>nd</sup> degree NEC<br>4271 Paroxysmal ventricular tachycardia<br>42731 Atrial fibrillation<br>42761 Atrial premature beats<br>42769 Premature beats NEC<br>42781 Sinoatrial node dysfunction<br>42789 Cardiac dysrhythmia<br>42832 Atrial flutter<br>7850 Tachycardia NOS                                                                                                                                                                                                                                                                                                                                                                                 |
| Coronary artery disease/<br>myocardial infarction | 4100 Post myocardial infarction syndrome<br>41031 Acute myocardial infarction inferopost, initial<br>41040 Acute myocardial infarction inferior wall,<br>unspecified<br>41041 Acute myocardial infarction inferior wall,                                                                                                                                                                                                                                                                                                                                                                                                                                                           |

1  
2  
3  
4  
5  
6  
7  
8  
9  
10  
11  
12  
13  
14  
15  
16  
17  
18  
19  
20  
21  
22  
23  
24  
25  
26  
27  
28  
29  
30  
31  
32  
33  
34  
35  
36  
37  
38  
39  
40  
41  
42  
43  
44  
45  
46  
47  
48  
49  
50  
51  
52  
53  
54  
55  
56  
57  
58  
59  
60  
61  
62  
63  
64  
65

|                             |                                                                                                                                                                                                                                                  |
|-----------------------------|--------------------------------------------------------------------------------------------------------------------------------------------------------------------------------------------------------------------------------------------------|
|                             | initial<br>41071 Subendocardial infarction, initial<br>41072 Subendocardial infarct, subseq<br>41081 Acute myocardial infarction NEC, initial<br>41400 Coronary athrosclerosis unspecified vessel<br>41401 Coronary athrosclerosis native vessel |
| Congestive heart failure    | 39891 Rheumatic heart failure<br>40291 Hypertensive heart disease with congestive heart failure<br>4280 Congestive heart failure                                                                                                                 |
| Chest Pain                  | 4139 Angina pectoris NEC/NOS<br>78650 Chest pain, NOS<br>78651 Precordial pain<br>78659 Chest pain                                                                                                                                               |
| Hypotension                 | 4580 Orthostatic hypotension<br>4588 Other specific hypotension<br>4589 Hypotension, NOS                                                                                                                                                         |
| Other cardiac               | 40290 Hypertensive heart disease NOS<br>4290 Myocarditis<br>44031 Aortic valve disorder<br>99672 Complications - other cardiac device                                                                                                            |
| <b>Vascular</b>             |                                                                                                                                                                                                                                                  |
| Peripheral vascular disease | 44021 Atherosclerosis of the extremities with intermittent claudication<br>44024 Atherosclerosis of the extremities with gangrene<br>44031 Atherosclerosis of autologous vein bypass graft<br>4439 Peripheral vascular disease NOS               |
| Embolism                    | 4440 Abdominal aortic embolism<br>44421 Upper extremity embolism<br>4471 Stricture of artery<br>5579 Vascular insufficiency intestine NOS                                                                                                        |
| Venous thrombosis           | 4538 Venous thrombosis NEC<br>4539 Venous thrombosis NOS                                                                                                                                                                                         |
| Phlebitis                   | 4510 Superficial phlebitis – leg<br>45119 Deep phlebitis, leg NEC                                                                                                                                                                                |
| Other vascular              | 43310 Occlusion of carotid artery without infarction<br>4413 Ruptured abdominal aortic aneurysm<br>9972 Surgical complication – peripheral vascular system                                                                                       |
| <b>Pain</b>                 |                                                                                                                                                                                                                                                  |
| Anal/rectal pain            | 56842 Anal/rectal pain<br>56942 Anal or rectal pain                                                                                                                                                                                              |
| Abdominal pain              | 78900 Abdominal pain unspecified site                                                                                                                                                                                                            |

1  
2  
3  
4  
5  
6  
7  
8  
9  
10  
11  
12  
13  
14  
15  
16  
17  
18  
19  
20  
21  
22  
23  
24  
25  
26  
27  
28  
29  
30  
31  
32  
33  
34  
35  
36  
37  
38  
39  
40  
41  
42  
43  
44  
45  
46  
47  
48  
49  
50  
51  
52  
53  
54  
55  
56  
57  
58  
59  
60  
61  
62  
63  
64  
65

|                                        |                                                                                                                                                                                                                                                                                                                                                                                                                                                   |
|----------------------------------------|---------------------------------------------------------------------------------------------------------------------------------------------------------------------------------------------------------------------------------------------------------------------------------------------------------------------------------------------------------------------------------------------------------------------------------------------------|
|                                        | 78901 Abdominal pain right upper quadrant<br>78903 Abdominal pain right lower quadrant<br>78907 Abdominal pain generalized<br>78909 Abdominal pain other specified site                                                                                                                                                                                                                                                                           |
| Joint/limb pain                        | 71945 Joint pain, pelvis<br>71946 Joint pain, left leg<br>7295 Pain in limb<br>78652 Painful respiration                                                                                                                                                                                                                                                                                                                                          |
| <b>Electrolyte/renal abnormalities</b> |                                                                                                                                                                                                                                                                                                                                                                                                                                                   |
| Acute renal failure                    | 5848 Acute renal failure, NEC<br>5849 Acute renal failure, NOS                                                                                                                                                                                                                                                                                                                                                                                    |
| Potassium abnormality                  | 2767 Hyperpotassemia<br>2768 Hypopotassemia                                                                                                                                                                                                                                                                                                                                                                                                       |
| Other electrolyte/renal abnormalities  | 2761 Hyposmolality<br>2765 Hypovolemia<br>2766 Fluid overload<br>2769 Electrolyte/fluid disorder NEC                                                                                                                                                                                                                                                                                                                                              |
| <b>Orthopedic</b>                      |                                                                                                                                                                                                                                                                                                                                                                                                                                                   |
| Osteoarthritis                         | 71509 General osteoarthritis<br>71515 Osteoarthritis, localized, primary, pelvis<br>71516 Osteoarthritis, localized, primary, left leg<br>71535 Localized osteoarthritis NOS, pelvis<br>71536 Localized osteoarthritis NOS, L leg<br>71589 Osteoarthritis, multiple sites<br>71595 Osteoarthritis NOS, pelvis<br>71596 Osteoarthritis NOS, left leg                                                                                               |
| Arthritis                              | 71106 Pyogenic arthritis, left leg<br>7140 Rheumatoid arthritis<br>71655 Polyarthritis NOS, pelvis<br>71656 Polyarthritis NOS, left leg<br>71659 Polyarthritis NOS, multiple sites                                                                                                                                                                                                                                                                |
| Fracture, vertebra                     | 73313 Pathologic fracture of vertebrae<br>8052 Fracture dorsal vertebra – closed<br>8054 Fracture lumbar vertebra – closed                                                                                                                                                                                                                                                                                                                        |
| Fracture, other                        | 73382 Nonunion of fracture<br>8082 Fracture of pubis – closed<br>81341 Colles' fracture – closed<br>82009 Fracture femur, other – closed<br>82020 Trochanteric fracture NOS - closed<br>82021 Intertrochanteric fracture – closed<br>8208 Fracture neck of femur – closed<br>82100 Fracture femur NOS – closed<br>82101 Fracture femur shaft – closed<br>82120 Fracture low end femur NOS - closed<br>82122 Fracture low femur epiphysis - closed |

1  
2  
3  
4  
5  
6  
7  
8  
9  
10  
11  
12  
13  
14  
15  
16  
17  
18  
19  
20  
21  
22  
23  
24  
25  
26  
27  
28  
29  
30  
31  
32  
33  
34  
35  
36  
37  
38  
39  
40  
41  
42  
43  
44  
45  
46  
47  
48  
49  
50  
51  
52  
53  
54  
55  
56  
57  
58  
59  
60  
61  
62  
63  
64  
65

|                         |                                                                                                                                                                                                                                                                                                                                                                                                                                                                                                                                                                                                                 |
|-------------------------|-----------------------------------------------------------------------------------------------------------------------------------------------------------------------------------------------------------------------------------------------------------------------------------------------------------------------------------------------------------------------------------------------------------------------------------------------------------------------------------------------------------------------------------------------------------------------------------------------------------------|
|                         | 82123 Supracondylar fracture femur - closed                                                                                                                                                                                                                                                                                                                                                                                                                                                                                                                                                                     |
|                         | 8220 Fracture patella – closed                                                                                                                                                                                                                                                                                                                                                                                                                                                                                                                                                                                  |
| Device reaction         | 9964 Mechanical complication of internal orthopedic device, implant and graft<br>99666 Infection and inflammatory reaction due to internal joint prosthesis<br>99667 Infection and inflammatory reaction due to other internal orthopedic device, implant and graft<br>99677 Other complications of internal joint prosthesis                                                                                                                                                                                                                                                                                   |
| Other orthopedic        | 71616 Traumatic arthroplasty of lower leg<br>7176 Loose body in knee<br>71846 Joint contracture left leg<br>71906 Joint effusion, left leg<br>72252 Lumbar orlumbosacral intervetregral disc degeneration<br>72871 Plantar fascial fibromatosis<br>8448 Sprain of knee and leg NEC<br>92401 Contusion of hip                                                                                                                                                                                                                                                                                                    |
| <b>Other</b>            |                                                                                                                                                                                                                                                                                                                                                                                                                                                                                                                                                                                                                 |
| Other complication      | 41519 Other<br>56969 Other complication<br>99883 Other complication<br>99889 Other specific complication procedure, NEC                                                                                                                                                                                                                                                                                                                                                                                                                                                                                         |
| Wound complication      | 8912 Open wound knee/leg w/ tendon<br>99813 Seroma complicating procedure<br>9983 Postop wound disruption<br>99883 Non-healing wound                                                                                                                                                                                                                                                                                                                                                                                                                                                                            |
| Fever of unknown origin | 7806 Pyrexia, unknown origin                                                                                                                                                                                                                                                                                                                                                                                                                                                                                                                                                                                    |
| Benign neoplasm         | 2112 Benign neoplasm small bowel<br>2113 Benign neoplasm large bowel<br>226 Benign neoplasm thyroid                                                                                                                                                                                                                                                                                                                                                                                                                                                                                                             |
| Malignancy              | 1479 Malignant neoplasm nasopharynx NOS<br>1530 Malignant neoplasm hepatic flexure<br>1532 Malignant neoplasm descending colon<br>1533 Malignant neoplasm sigmoid colon<br>1534 Malignant neoplasm cecum<br>1536 malignant meoplasm ascending colon<br>1539 Malignant neoplasm colon NOS<br>1540 Malignant neoplasm rectosigmoid junction<br>1550 Malignant neoplasm liver, primary<br>1551 Malignant neoplasm intrahepatic ducts<br>1562 Malignant neoplasm ampulla of vater<br>1623 Malignant neoplasm, upper lobe lung<br>1625 Malignant neoplasm lower lobe lung<br>1629 Malignant neoplasm bronch/lung NOS |

1  
2  
3  
4  
5  
6  
7  
8  
9  
10  
11  
12  
13  
14  
15  
16  
17  
18  
19  
20  
21  
22  
23  
24  
25  
26  
27  
28  
29  
30  
31  
32  
33  
34  
35  
36  
37  
38  
39  
40  
41  
42  
43  
44  
45  
46  
47  
48  
49  
50  
51  
52  
53  
54  
55  
56  
57  
58  
59  
60  
61  
62  
63  
64  
65

|                      |                                                                           |
|----------------------|---------------------------------------------------------------------------|
|                      | 1742 Malignant neoplasm breast up – inner                                 |
|                      | 1748 Malignant neoplasm breast NEC                                        |
|                      | 185 Malignant neoplasm prostate                                           |
|                      | 1888 Malignant neoplasm bladder NEC                                       |
|                      | 1891 Malignant neoplasm renal pelvis                                      |
|                      | 1960 Malignant neoplasm lymph – head/neck                                 |
|                      | 1990 Malignant neoplasm disseminated                                      |
|                      | 1970 Secondary malignancy neo lung                                        |
|                      | 1972 Secondary malignancy neo pleura                                      |
|                      | 1976 Secondary malignancy neo peritoneum                                  |
|                      | 1977 Secondary malignancy neo liver                                       |
|                      | 1978 Secondary malignancy neo GI nec                                      |
|                      | 1981 Secondary malignancy neo urin nec                                    |
| Secondary malignancy | 1983 Secondary mal neo brain/spine                                        |
|                      | 1984 Secondary malignancy neo nerve nec                                   |
|                      | 1985 Secondary malignancy neo bone                                        |
| Lymphoma             | 20288 Lymphomas nec mult                                                  |
| Leukemia             | 20410 Chronic lymphoid leukemia without remission                         |
|                      | 20510 Chronic myeloid leukemia without remission                          |
| Chemotherapy         | V581 Chemotherapy encounter                                               |
| Diabetes             | 25011 Diabetes with ketoacidosis, Type I                                  |
|                      | 25060 Diabetes with neurological manifestations, Type II                  |
|                      | 25061 Diabetes with neurological manifestations, Type I                   |
|                      | 25080 Diabetes with other specified manifestations, Type II               |
|                      | 25081 Diabetes with other specified manifestations, Type I                |
|                      | 25082 Diabetes with other specified manifestations, type II, uncontrolled |
| Anemia               | 2800 Chronic blood loss anemia                                            |
|                      | 2809 Iron deficiency anemia, NOS                                          |
|                      | 2858 Anemia, NEC                                                          |
|                      | 2859 Anemia, NOS                                                          |
| Medication poisoning | 9623 Poisoning, insulin and antidiabetic agents                           |
|                      | 9642 Poisoning anticoagulants                                             |
|                      | 9698 Poisoning psychotropic NEC                                           |
|                      | 9729 Poisoning cardiovascular agent NEC                                   |
| Endocrine            | 2449 Hypothyroidism NOS                                                   |
|                      | 2520 Hyperparathyroidism                                                  |
| Gynecologic          | 6144 Chronic parametritis                                                 |
| Other                | 2740 Gouty arthropathy                                                    |
|                      | 2749 Gout                                                                 |
|                      | 2888 WBC disease NEC                                                      |



1  
2  
3  
4  
5  
6  
7  
8  
9  
10  
11  
12  
13  
14  
15  
16  
17  
18  
19  
20  
21  
22  
23  
24  
25  
26  
27  
28  
29  
30  
31  
32  
33  
34  
35  
36  
37  
38  
39  
40  
41  
42  
43  
44  
45  
46  
47  
48  
49  
50  
51  
52  
53  
54  
55  
56  
57  
58  
59  
60  
61  
62  
63  
64  
65

|       |                                        |
|-------|----------------------------------------|
| 37000 | Corneal ulcer NOS                      |
| 7070  | Decubitus ulcer                        |
| 7211  | Cervical spondylosis with myelopathy   |
| 72981 | Swelling of limb                       |
| 7336  | Tietze's disease                       |
| 7812  | Abnormality of gait                    |
| 7823  | Edema                                  |
| 7868  | Hiccough                               |
| 9587  | Traumatic subcutaneous emphysema       |
| 99662 | Reaction - other vascular device/graft |
| 99673 | Comp - renal dialysis device/graft     |
